# Supplementary material
Source: MDPI journal article supplement (https://www.mdpi.com/2076-3417/10/21/7518)
Supplement: s1 [file s1]

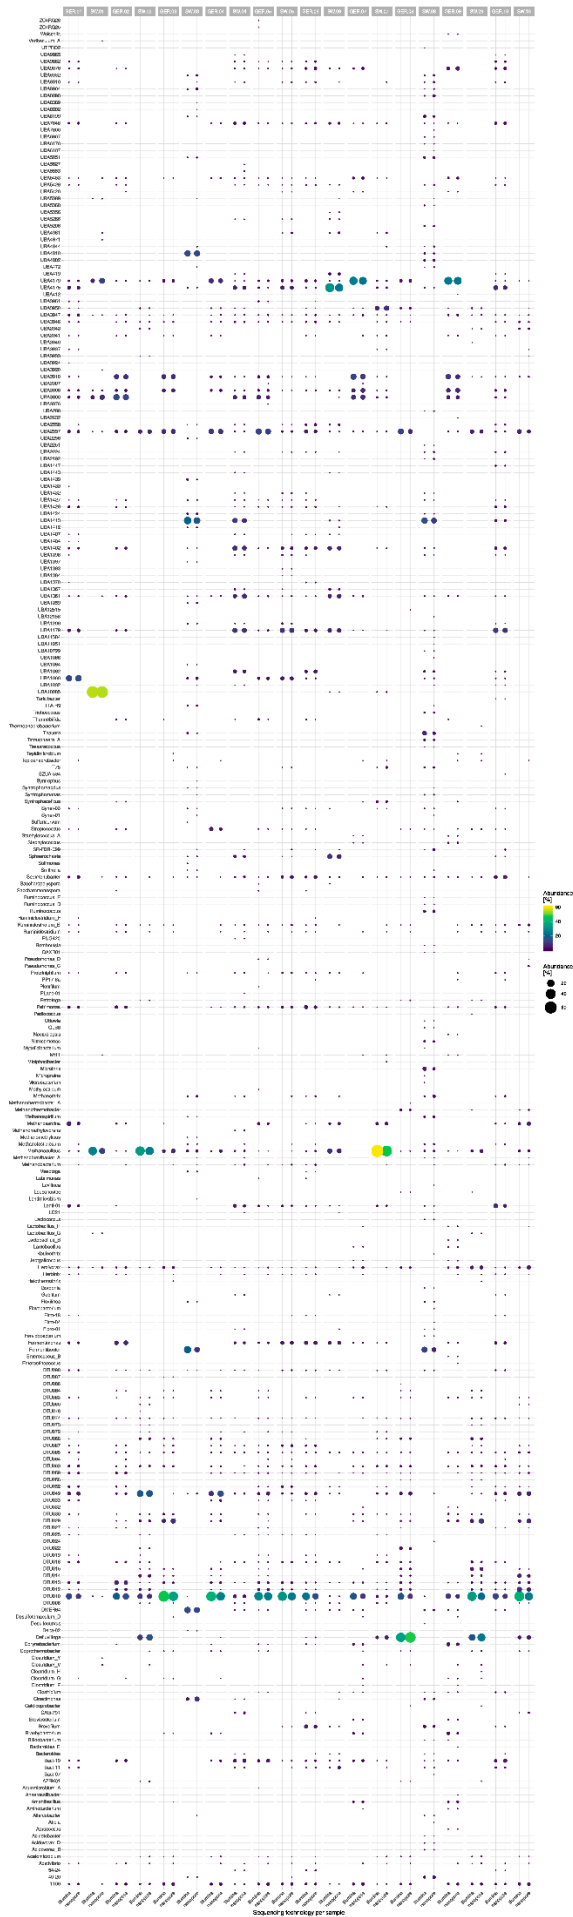

**Figure S1.** Summary of abundance for samples from all 20 reactors, calculated on the basis of all classified reads for nanopore and Illumina sequencing (genus taxon).
